# Supplementary material
Source: Elsevier journal article supplement (https://comptes-rendus.academie-sciences.fr/chimie/article/10.1016/j.crci.2010.05.018/file/attach/mmc1.pdf)
Supplement: mmc1 [file mmc1.pdf]

## Supplementary information

Optimised geometries in Cartesian coordinates (in angstroms) and total energies (in hartrees) at the B3LYP/aug-cc-pVTZ level of theory.

### I' ( $D_{3h}$ )

E=-1140.276969

|   |           |           |          |
|---|-----------|-----------|----------|
| P | 1.595812  | 0.921342  | 0.000000 |
| P | 0.000000  | -1.842685 | 0.000000 |
| P | -1.595812 | 0.921342  | 0.000000 |
| C | 0.000000  | 1.594696  | 0.000000 |
| C | 1.381047  | -0.797348 | 0.000000 |
| C | -1.381047 | -0.797348 | 0.000000 |
| H | 2.321541  | -1.340342 | 0.000000 |
| H | -2.321541 | -1.340342 | 0.000000 |
| H | 0.000000  | 2.680684  | 0.000000 |

### II' ( $C_{2v}$ )

E=-1141.4491595

|   |           |           |           |
|---|-----------|-----------|-----------|
| P | 0.000000  | 1.587410  | -0.980350 |
| P | 0.000000  | -1.587410 | -0.980350 |
| P | 0.000000  | 0.000000  | 1.709482  |
| C | 0.000000  | 0.000000  | -1.671356 |
| C | 0.000000  | -1.438508 | 0.726307  |
| C | 0.000000  | 1.438508  | 0.726307  |
| H | 0.000000  | 0.000000  | -2.757616 |
| H | 0.000000  | -2.376727 | 1.271841  |
| H | -1.072381 | 0.000000  | 2.647330  |
| H | 0.000000  | 2.376727  | 1.271841  |
| H | 1.072381  | 0.000000  | 2.647330  |

### III' ( $C_{2v}$ )

E=-1142.6254106

|   |           |           |           |
|---|-----------|-----------|-----------|
| P | 0.000000  | 1.514494  | -0.819388 |
| P | 0.000000  | -1.514494 | -0.819388 |
| P | 0.000000  | 0.000000  | 1.880528  |
| C | 0.000000  | 0.000000  | -1.613608 |
| C | 0.000000  | -1.407041 | 0.909995  |
| C | 0.000000  | 1.407041  | 0.909995  |
| H | 0.000000  | 0.000000  | -2.700107 |
| H | 0.000000  | -2.352045 | 1.447912  |
| H | 0.000000  | 2.352045  | 1.447912  |
| H | 1.064434  | 2.349197  | -1.265076 |
| H | -1.064434 | 2.349197  | -1.265076 |

|   |           |           |           |
|---|-----------|-----------|-----------|
| H | -1.064434 | -2.349197 | -1.265076 |
| H | 1.064434  | -2.349197 | -1.265076 |

**IV' ( $C_s$ )**

E=-1143.7968693

|   |           |           |           |
|---|-----------|-----------|-----------|
| P | 0.088569  | -0.866987 | 1.519528  |
| P | 0.088569  | -0.866987 | -1.519528 |
| P | -0.197633 | 1.713969  | 0.000000  |
| C | -0.118419 | -1.634824 | 0.000000  |
| C | 0.088569  | 0.842982  | 1.453753  |
| C | 0.088569  | 0.842982  | -1.453753 |
| H | -0.517225 | -2.637346 | 0.000000  |
| H | -1.463217 | 2.373286  | 0.000000  |
| H | 0.616903  | 2.869376  | 0.000000  |
| H | 0.324375  | 1.402493  | 2.346261  |
| H | 0.324375  | 1.402493  | -2.346261 |
| H | -0.896799 | -1.441829 | 2.367941  |
| H | -0.896799 | -1.441829 | -2.367941 |
| H | 1.231760  | -1.266709 | 2.270186  |
| H | 1.231760  | -1.266709 | -2.270186 |

**I' planar ( $D_{3h}$ , NImag=2)**

E=-1143.7963647

|   |           |           |           |
|---|-----------|-----------|-----------|
| P | -1.516128 | 0.875337  | 0.000000  |
| P | 1.516128  | 0.875337  | 0.000000  |
| P | 0.000000  | -1.750674 | 0.000000  |
| C | 0.000000  | 1.670269  | 0.000000  |
| C | 1.446495  | -0.835135 | 0.000000  |
| C | -1.446495 | -0.835135 | 0.000000  |
| H | 0.000000  | 2.750002  | 0.000000  |
| H | 2.381571  | -1.375001 | 0.000000  |
| H | -2.381571 | -1.375001 | 0.000000  |
| H | -2.333814 | 1.347428  | 1.065480  |
| H | -2.333814 | 1.347428  | -1.065480 |
| H | 2.333814  | 1.347428  | -1.065480 |
| H | 2.333814  | 1.347428  | 1.065480  |
| H | 0.000000  | -2.694856 | -1.065480 |
| H | 0.000000  | -2.694856 | 1.065480  |

**I' TS ( $C_2$ , NImag=1)**

E=-1143.7968224

|   |          |           |           |
|---|----------|-----------|-----------|
| P | 0.000000 | 0.000000  | 1.769551  |
| P | 0.000000 | -1.511416 | -0.874453 |
| P | 0.000000 | 1.511416  | -0.874453 |
| C | 0.000000 | 0.000000  | -1.712831 |

|   |           |           |           |
|---|-----------|-----------|-----------|
| H | 0.000000  | 0.000000  | -2.804127 |
| H | -1.077718 | -0.053652 | 2.727444  |
| H | 1.077718  | 0.053652  | 2.727444  |
| C | 0.289540  | -1.417435 | 0.830947  |
| C | -0.289540 | 1.417435  | 0.830947  |
| H | 0.761601  | -2.274745 | 1.311156  |
| H | -0.761601 | 2.274745  | 1.311156  |
| H | 0.986778  | -2.413646 | -1.392202 |
| H | -0.986778 | 2.413646  | -1.392202 |
| H | -1.159232 | -2.291912 | -1.246370 |
| H | 1.159232  | 2.291912  | -1.246370 |

### HPCH<sub>2</sub> (*C<sub>s</sub>*)

E=-381.2725742

|   |           |           |          |
|---|-----------|-----------|----------|
| C | 0.056558  | 1.071834  | 0.000000 |
| P | 0.056558  | -0.595635 | 0.000000 |
| H | 1.001168  | 1.601678  | 0.000000 |
| H | -0.829821 | 1.691571  | 0.000000 |
| H | -1.359065 | -0.789730 | 0.000000 |

### H<sub>3</sub>PCH<sub>2</sub> (*C<sub>s</sub>*)

E=-382.4359378

|   |           |           |           |
|---|-----------|-----------|-----------|
| P | -0.013849 | -0.477953 | 0.000000  |
| C | -0.013849 | 1.199902  | 0.000000  |
| H | 1.112376  | -1.385217 | 0.000000  |
| H | -0.685244 | -1.008751 | 1.116978  |
| H | -0.685244 | -1.008751 | -1.116978 |
| H | 0.274470  | 1.686298  | 0.921685  |
| H | 0.274470  | 1.686298  | -0.921685 |

### Benzene (*D<sub>6h</sub>*)

E=-232.335571

|   |           |           |          |
|---|-----------|-----------|----------|
| C | 0.000000  | 1.391033  | 0.000000 |
| C | 1.204670  | 0.695517  | 0.000000 |
| C | 1.204670  | -0.695517 | 0.000000 |
| C | 0.000000  | -1.391033 | 0.000000 |
| C | -1.204670 | -0.695517 | 0.000000 |
| C | -1.204670 | 0.695517  | 0.000000 |
| H | 2.141581  | 1.236442  | 0.000000 |
| H | 2.141581  | -1.236442 | 0.000000 |
| H | 0.000000  | -2.472884 | 0.000000 |
| H | -2.141581 | -1.236442 | 0.000000 |
| H | -2.141581 | 1.236442  | 0.000000 |
| H | 0.000000  | 2.472884  | 0.000000 |

Optimised geometries in Cartesian coordinates (in angstroms) and total energies (in hartrees) at the B3LYP/cc-pVDZ level of theory.

# I

E=-1611.9392974

|   |           |           |           |
|---|-----------|-----------|-----------|
| P | 0.122064  | -1.838287 | 0.000000  |
| P | -1.653089 | 0.813516  | 0.000000  |
| P | 1.531103  | 1.024915  | 0.000000  |
| C | -1.368985 | -0.935647 | 0.000000  |
| C | -2.689895 | -1.773826 | 0.000000  |
| C | -3.517773 | -1.431835 | 1.263427  |
| C | 1.494931  | -0.717694 | 0.000000  |
| C | 2.881293  | -1.442636 | 0.000000  |
| C | 2.998691  | -2.330450 | 1.263475  |
| C | -0.125819 | 1.653475  | 0.000000  |
| C | -0.191269 | 3.216519  | 0.000000  |
| C | 0.518817  | 3.762204  | 1.263515  |
| C | -2.448400 | -3.297228 | 0.000000  |
| C | -3.517773 | -1.431835 | -1.263427 |
| C | -1.631308 | 3.769033  | 0.000000  |
| C | 0.518816  | 3.762204  | -1.263515 |
| C | 4.080048  | -0.471928 | 0.000000  |
| C | 2.998691  | -2.330449 | -1.263475 |
| H | -3.421789 | -3.814190 | 0.000000  |
| H | -2.198054 | 3.452473  | -0.889032 |
| H | 5.014398  | -1.056505 | 0.000000  |
| H | -2.952475 | -1.669692 | -2.178907 |
| H | -2.952475 | -1.669692 | 2.178908  |
| H | -3.789727 | -0.366151 | -1.299351 |
| H | -3.789727 | -0.366150 | 1.299351  |
| H | -4.450073 | -2.020891 | 1.273678  |
| H | -4.450073 | -2.020890 | -1.273678 |
| H | -1.890787 | -3.629799 | -0.888965 |
| H | -1.890787 | -3.629799 | 0.888966  |
| H | 0.474445  | 4.864140  | -1.274612 |
| H | 0.474444  | 4.864140  | 1.274611  |
| H | 1.577836  | 3.465208  | -1.299114 |
| H | 1.577836  | 3.465207  | 1.299114  |
| H | 0.030414  | 3.390695  | -2.178786 |
| H | 0.030415  | 3.390694  | 2.178786  |
| H | -1.592297 | 4.870488  | 0.000000  |
| H | -2.198053 | 3.452472  | 0.889033  |
| H | 2.211793  | -3.098852 | 1.298767  |
| H | 2.211793  | -3.098851 | -1.298766 |
| H | 2.921234  | -1.721839 | -2.178825 |
| H | 2.921234  | -1.721839 | 2.178825  |
| H | 3.975043  | -2.843199 | -1.274507 |
| H | 3.975043  | -2.843199 | 1.274508  |
| H | 4.089417  | 0.177212  | -0.888995 |
| H | 4.089417  | 0.177212  | 0.888995  |

## II

E=-1613.1001803

|   |           |           |           |
|---|-----------|-----------|-----------|
| P | -0.911180 | -1.627902 | -0.268030 |
| P | -1.023521 | 1.524336  | -0.288297 |
| P | 1.101089  | 0.029678  | 1.043628  |
| C | -1.726738 | -0.081210 | 0.003722  |
| C | -3.290647 | -0.099190 | 0.042096  |
| C | -3.770958 | 0.763282  | 1.233270  |
| C | 0.759233  | -1.459985 | 0.162360  |
| C | 1.840736  | -2.517645 | -0.140365 |
| C | 2.424822  | -3.073473 | 1.180833  |
| C | 0.644585  | 1.495045  | 0.165372  |
| C | 1.643770  | 2.630377  | -0.136889 |
| C | 2.196017  | 3.214623  | 1.185538  |
| C | 0.960408  | 3.771077  | -0.915741 |
| C | 2.821910  | 2.108310  | -0.991663 |
| C | -3.858221 | -1.519703 | 0.242662  |
| C | -3.892397 | 0.469366  | -1.265767 |
| C | 2.985761  | -1.908141 | -0.981949 |
| C | 1.245129  | -3.697124 | -0.933509 |
| H | -4.954937 | -1.466384 | 0.344794  |
| H | 0.560727  | 3.421223  | -1.880132 |
| H | 3.742060  | -2.676726 | -1.216590 |
| H | -3.576890 | -0.131627 | -2.133688 |
| H | -3.372114 | 0.374782  | 2.184464  |
| H | -3.576299 | 1.509033  | -1.441709 |
| H | -3.439928 | 1.809276  | 1.132397  |
| H | -4.872986 | 0.760553  | 1.294788  |
| H | -4.994980 | 0.456243  | -1.221497 |
| H | -3.634830 | -2.181664 | -0.607795 |
| H | -3.456823 | -1.993149 | 1.153258  |
| H | 3.522158  | 2.928653  | -1.225097 |
| H | 2.908406  | 4.031988  | 0.982058  |
| H | 3.397429  | 1.327571  | -0.468653 |
| H | 2.733360  | 2.456638  | 1.779755  |
| H | 2.459790  | 1.682096  | -1.939958 |
| H | 1.380497  | 3.616475  | 1.807219  |
| H | 1.693110  | 4.568964  | -1.119113 |
| H | 0.127014  | 4.210616  | -0.346548 |
| H | 1.636568  | -3.542218 | 1.790712  |
| H | 0.442666  | -4.201323 | -0.373542 |
| H | 0.825817  | -3.366914 | -1.896528 |
| H | 2.898130  | -2.283579 | 1.788020  |
| H | 2.033803  | -4.438770 | -1.140911 |
| H | 3.199108  | -3.832179 | 0.975783  |
| H | 2.602531  | -1.499260 | -1.929566 |
| H | 3.503703  | -1.094822 | -0.448006 |
| H | 0.364502  | 0.005813  | 2.273271  |
| H | 2.452144  | 0.083357  | 1.473486  |

### III

E=-1614.2565775

|   |           |           |           |
|---|-----------|-----------|-----------|
| P | -1.658756 | 0.465237  | -0.185508 |
| P | 0.438343  | -1.799523 | -0.077952 |
| P | 1.273817  | 1.175569  | -0.099869 |
| C | -1.196955 | -1.237217 | -0.104676 |
| C | -2.357432 | -2.269389 | 0.037126  |
| C | -1.890720 | -3.702623 | -0.292626 |
| C | -0.394500 | 1.652402  | -0.134595 |
| C | -0.767403 | 3.154048  | 0.048548  |
| C | 0.316907  | 4.076686  | -0.549818 |
| C | 1.636615  | -0.551185 | -0.121275 |
| C | 3.138027  | -0.956306 | 0.017249  |
| C | 3.566436  | -0.900516 | 1.503855  |
| C | 4.058382  | -0.018935 | -0.798116 |
| C | 3.387370  | -2.389047 | -0.500869 |
| C | -2.087765 | 3.492471  | -0.678279 |
| C | -0.925223 | 3.487134  | 1.550831  |
| C | -3.525043 | -1.941942 | -0.922829 |
| C | -2.891608 | -2.269111 | 1.490533  |
| H | -2.511743 | 0.679139  | -1.320986 |
| H | -2.653389 | 0.742823  | 0.819655  |
| H | 1.963932  | 1.802310  | 1.002635  |
| H | 2.002299  | 1.836021  | -1.143106 |
| H | -2.022106 | 3.264727  | -1.754114 |
| H | -2.950129 | 2.945981  | -0.262725 |
| H | -2.313430 | 4.566138  | -0.570191 |
| H | -1.716618 | 2.875024  | 2.013233  |
| H | -1.189307 | 4.548730  | 1.702898  |
| H | 0.010398  | 3.290799  | 2.099220  |
| H | 0.018467  | 5.131390  | -0.432763 |
| H | 1.290096  | 3.966359  | -0.044258 |
| H | 0.462388  | 3.881583  | -1.624240 |
| H | 3.773644  | -0.003391 | -1.862506 |
| H | 4.049683  | 1.018364  | -0.424344 |
| H | 5.102167  | -0.367075 | -0.730789 |
| H | 2.969954  | -1.605949 | 2.103232  |
| H | 4.632677  | -1.163220 | 1.620125  |
| H | 3.425086  | 0.105589  | 1.931934  |
| H | 3.094633  | -2.487505 | -1.558179 |
| H | 2.828017  | -3.141794 | 0.072729  |
| H | 4.459904  | -2.630306 | -0.414626 |
| H | -3.728004 | -2.980863 | 1.603691  |
| H | -2.094981 | -2.558136 | 2.193753  |
| H | -3.262308 | -1.276199 | 1.793228  |
| H | -2.745046 | -4.394041 | -0.205113 |
| H | -1.494527 | -3.771174 | -1.317953 |
| H | -1.105204 | -4.051690 | 0.393148  |

|   |           |           |           |
|---|-----------|-----------|-----------|
| H | -4.306702 | -2.715661 | -0.845646 |
| H | -4.010830 | -0.980111 | -0.688849 |
| H | -3.182615 | -1.905927 | -1.969517 |

#### IV

E=-1615.4150232

|   |           |           |           |
|---|-----------|-----------|-----------|
| P | -0.055981 | -1.744163 | 0.002720  |
| P | -1.477351 | 0.918769  | 0.037760  |
| P | 1.532085  | 0.818696  | -0.164854 |
| C | -1.518879 | -0.815911 | 0.138141  |
| C | -2.887795 | -1.543470 | -0.012970 |
| C | -3.268386 | -1.717401 | -1.502721 |
| C | 1.464236  | -0.918270 | -0.164367 |
| C | 2.781748  | -1.726069 | 0.027262  |
| C | 3.965496  | -1.026434 | -0.675875 |
| C | 0.049024  | 1.725792  | -0.164317 |
| C | 0.105775  | 3.271343  | 0.018737  |
| C | 1.327926  | 3.869108  | -0.712313 |
| C | -2.842938 | -2.936636 | 0.652752  |
| C | -4.009024 | -0.751843 | 0.696262  |
| C | -1.146274 | 3.939857  | -0.590518 |
| C | 0.193381  | 3.654129  | 1.516005  |
| C | 2.659593  | -3.130315 | -0.604776 |
| C | 3.125391  | -1.884331 | 1.528043  |
| H | 2.363831  | 1.268411  | -1.242836 |
| H | 2.398966  | 1.276104  | 0.900922  |
| H | -2.403462 | 1.344210  | -0.979438 |
| H | -0.220130 | -2.719730 | -1.045399 |
| H | -2.183985 | 1.509762  | 1.146782  |
| H | 0.044715  | -2.693144 | 1.081876  |
| H | -3.828608 | -3.424645 | 0.576105  |
| H | -2.118668 | -3.611696 | 0.168008  |
| H | -2.580940 | -2.859221 | 1.719794  |
| H | -4.238691 | -2.233251 | -1.614818 |
| H | -3.347674 | -0.741677 | -2.009061 |
| H | -2.509637 | -2.310059 | -2.039219 |
| H | -4.963906 | -1.298023 | 0.620885  |
| H | -3.779269 | -0.608110 | 1.763858  |
| H | -4.176461 | 0.239271  | 0.243629  |
| H | 3.610262  | -3.678682 | -0.497407 |
| H | 1.884851  | -3.745380 | -0.118391 |
| H | 2.421317  | -3.063322 | -1.678078 |
| H | 4.878626  | -1.635053 | -0.569893 |
| H | 3.767876  | -0.889875 | -1.750865 |
| H | 4.192030  | -0.040061 | -0.238381 |
| H | 4.059949  | -2.455625 | 1.670872  |
| H | 3.255983  | -0.901657 | 2.009593  |
| H | 2.323350  | -2.415058 | 2.066122  |
| H | 1.324611  | 4.967298  | -0.614967 |

|   |           |          |           |
|---|-----------|----------|-----------|
| H | 2.283734  | 3.518399 | -0.289624 |
| H | 1.313372  | 3.620068 | -1.785196 |
| H | 0.234472  | 4.749682 | 1.651105  |
| H | -0.680548 | 3.280805 | 2.074238  |
| H | 1.094840  | 3.225131 | 1.982426  |
| H | -1.076255 | 5.035946 | -0.492896 |
| H | -1.246379 | 3.695812 | -1.659973 |
| H | -2.075119 | 3.636532 | -0.080240 |

Optimised geometries in Cartesian coordinates (in angstroms) and total energies (in hartrees) at the B3LYP/cc-pVDZ(-PP) level of theory.

### V' ( $C_{3v}$ )

E=-1548.3503148

|    |           |           |           |
|----|-----------|-----------|-----------|
| Mo | 0.000000  | 0.000000  | 0.349926  |
| P  | -1.662259 | 0.959706  | -1.494224 |
| P  | 0.000000  | -1.919411 | -1.494224 |
| P  | 1.662259  | 0.959706  | -1.494224 |
| O  | 2.205422  | -1.273301 | 2.238738  |
| O  | 0.000000  | 2.546602  | 2.238738  |
| O  | -2.205422 | -1.273301 | 2.238738  |
| C  | 1.400023  | -0.808304 | 1.557916  |
| C  | 0.000000  | 1.616608  | 1.557916  |
| C  | -1.400023 | -0.808304 | 1.557916  |
| C  | -1.373842 | -0.793188 | -1.410083 |
| C  | 1.373842  | -0.793188 | -1.410083 |
| C  | 0.000000  | 1.586376  | -1.410083 |
| H  | 0.000000  | 2.678314  | -1.282499 |
| H  | -2.319488 | -1.339157 | -1.282499 |
| H  | 2.319488  | -1.339157 | -1.282499 |

### VI' ( $C_s$ )

E=-1549.5122671

|    |           |           |           |
|----|-----------|-----------|-----------|
| Mo | 0.037718  | 0.453817  | 0.000000  |
| P  | -1.481447 | -2.153782 | 0.000000  |
| P  | 1.052093  | -1.259400 | 1.638208  |
| P  | 1.052093  | -1.259400 | -1.638208 |
| O  | 1.052093  | 2.617800  | 2.070297  |
| O  | 1.052093  | 2.617800  | -2.070297 |
| O  | -2.854956 | 1.734133  | 0.000000  |
| C  | -1.782240 | 1.301186  | 0.000000  |
| C  | 1.719095  | -1.356431 | 0.000000  |
| C  | -0.708045 | -1.399712 | 1.388090  |
| C  | -0.708045 | -1.399712 | -1.388090 |
| C  | 0.681774  | 1.809054  | 1.329826  |
| C  | 0.681774  | 1.809054  | -1.329826 |
| H  | -2.860210 | -1.816062 | 0.000000  |

|   |           |           |           |
|---|-----------|-----------|-----------|
| H | -1.569589 | -3.595611 | 0.000000  |
| H | 2.807330  | -1.208172 | 0.000000  |
| H | -1.301255 | -1.345113 | 2.306149  |
| H | -1.301255 | -1.345113 | -2.306149 |

### VII' (Cs)

E=-1550.6702613

|    |           |           |           |
|----|-----------|-----------|-----------|
| Mo | -0.032093 | 0.539130  | 0.000000  |
| P  | -0.488088 | -1.992048 | 1.500563  |
| P  | -0.488088 | -1.992048 | -1.500563 |
| P  | 2.084592  | -0.840995 | 0.000000  |
| O  | -1.613137 | 1.955554  | 2.340206  |
| O  | -1.613137 | 1.955554  | -2.340206 |
| O  | 1.817132  | 3.082502  | 0.000000  |
| C  | -1.328502 | -1.581023 | 0.000000  |
| C  | 1.152061  | 2.129594  | 0.000000  |
| C  | 1.026893  | -1.121387 | 1.418519  |
| C  | 1.026893  | -1.121387 | -1.418519 |
| C  | -1.040203 | 1.450613  | 1.464912  |
| C  | -1.040203 | 1.450613  | -1.464912 |
| H  | -2.409190 | -1.757879 | 0.000000  |
| H  | 1.528810  | -0.953387 | 2.377328  |
| H  | 1.528810  | -0.953387 | -2.377328 |
| H  | -0.434456 | -3.397091 | 1.858915  |
| H  | -0.434456 | -3.397091 | -1.858915 |
| H  | -1.283183 | -1.499640 | 2.566818  |
| H  | -1.283183 | -1.499640 | -2.566818 |

### VIII' (C<sub>3v</sub>)

E=-1551.8174705

|    |           |           |           |
|----|-----------|-----------|-----------|
| Mo | 0.000000  | 0.000000  | 0.629959  |
| P  | -1.517013 | -0.875848 | -1.725796 |
| P  | 1.517013  | -0.875848 | -1.725796 |
| P  | 0.000000  | 1.751696  | -1.725796 |
| O  | 2.239881  | -1.293196 | 2.403568  |
| O  | 0.000000  | 2.586392  | 2.403568  |
| O  | -2.239881 | -1.293196 | 2.403568  |
| C  | 1.393158  | -0.804340 | 1.761795  |
| C  | 0.000000  | 1.608680  | 1.761795  |
| C  | -1.393158 | -0.804340 | 1.761795  |
| C  | -1.409342 | 0.813684  | -1.236902 |
| C  | 0.000000  | -1.627368 | -1.236902 |
| C  | 1.409342  | 0.813684  | -1.236902 |
| H  | -2.357563 | 1.361140  | -1.208695 |
| H  | 0.000000  | -2.722279 | -1.208695 |
| H  | 2.357563  | 1.361140  | -1.208695 |
| H  | 0.000000  | 2.973064  | -1.011885 |

|   |           |           |           |
|---|-----------|-----------|-----------|
| H | -2.574749 | -1.486532 | -1.011885 |
| H | 2.574749  | -1.486532 | -1.011885 |
| H | 0.000000  | 2.259716  | -3.089814 |
| H | -1.956971 | -1.129858 | -3.089814 |
| H | 1.956971  | -1.129858 | -3.089814 |

## V

E=-2020.0894539

|    |           |           |           |
|----|-----------|-----------|-----------|
| Mo | -0.000147 | 0.002693  | 0.966097  |
| P  | 1.613601  | 0.983213  | -0.922951 |
| P  | 0.047297  | -1.895988 | -0.909485 |
| P  | -1.661929 | 0.899795  | -0.924113 |
| O  | -2.318651 | -0.815146 | 2.944229  |
| O  | 1.883361  | -1.579201 | 2.942601  |
| O  | 0.440499  | 2.430655  | 2.932415  |
| C  | -0.049005 | 1.646327  | -0.854133 |
| C  | 1.452694  | -0.786711 | -0.849707 |
| C  | -1.405270 | -0.871144 | -0.845907 |
| C  | -2.742802 | -1.702885 | -0.896444 |
| C  | -2.991420 | -2.030714 | -2.390082 |
| C  | -1.479645 | -0.519188 | 2.203915  |
| C  | -0.100477 | 3.220647  | -0.905511 |
| C  | -0.251117 | 3.600523  | -2.400219 |
| C  | 1.199939  | -1.007930 | 2.203590  |
| C  | 0.283473  | 1.551098  | 2.196646  |
| C  | -3.968227 | -0.923878 | -0.367371 |
| C  | -2.660790 | -3.026218 | -0.102204 |
| C  | 1.182411  | 3.892780  | -0.366515 |
| C  | -1.294550 | 3.811703  | -0.121907 |
| C  | 2.842426  | -1.527887 | -0.897964 |
| C  | 3.254213  | -1.576282 | -2.391007 |
| C  | 2.781816  | -2.979858 | -0.371877 |
| C  | 3.944851  | -0.793340 | -0.101882 |
| H  | 1.051889  | 4.986216  | -0.403382 |
| H  | -3.837602 | -0.604550 | 0.676597  |
| H  | 3.791470  | -3.417995 | -0.423965 |
| H  | -1.243575 | 3.558393  | 0.946850  |
| H  | 0.588932  | 3.211828  | -2.997880 |
| H  | -2.265519 | 3.470414  | -0.508329 |
| H  | -1.184703 | 3.198817  | -2.824709 |
| H  | -0.269173 | 4.697210  | -2.511171 |
| H  | -1.273446 | 4.909937  | -0.209431 |
| H  | 1.387056  | 3.616590  | 0.677810  |
| H  | 2.071261  | 3.649222  | -0.966228 |
| H  | -3.618359 | -3.562924 | -0.197818 |
| H  | -3.929926 | -2.598422 | -2.501121 |
| H  | -1.870925 | -3.694874 | -0.473226 |
| H  | -2.173197 | -2.636218 | -2.810676 |
| H  | -2.481368 | -2.845524 | 0.967660  |

|   |           |           |           |
|---|-----------|-----------|-----------|
| H | -3.076687 | -1.110822 | -2.990586 |
| H | -4.850360 | -1.582975 | -0.406669 |
| H | -4.197677 | -0.034760 | -0.972335 |
| H | 3.373141  | -0.563923 | -2.808237 |
| H | 4.139137  | 0.219234  | -0.483681 |
| H | 3.690089  | -0.714065 | 0.964820  |
| H | 2.500832  | -2.106489 | -2.995479 |
| H | 4.885347  | -1.361759 | -0.182273 |
| H | 4.214299  | -2.106842 | -2.501266 |
| H | 2.450907  | -3.028333 | 0.675521  |
| H | 2.117014  | -3.618525 | -0.971121 |

## VI

E= -2021.256768

|                |           |           |           |
|----------------|-----------|-----------|-----------|
| M <sub>o</sub> | 0.077988  | -0.026083 | 1.013713  |
| P              | 0.889591  | -1.640275 | -0.816919 |
| P              | 1.016506  | 1.600187  | -0.751687 |
| P              | -1.535489 | 0.089623  | -1.579451 |
| O              | 1.303276  | -2.134265 | 3.011874  |
| O              | -2.642437 | -0.111071 | 2.613805  |
| O              | 1.265173  | 2.032223  | 3.093541  |
| C              | 1.683109  | -0.046367 | -0.934719 |
| C              | 3.250630  | -0.081514 | -1.033741 |
| C              | 3.923880  | 0.885141  | -0.033265 |
| C              | 0.843721  | -1.375755 | 2.263503  |
| C              | -0.769177 | 1.475583  | -0.784871 |
| C              | -1.581742 | 2.812962  | -0.723578 |
| C              | -2.870608 | 2.652557  | 0.111015  |
| C              | -0.884376 | -1.369379 | -0.813141 |
| C              | -1.762748 | -2.667990 | -0.791700 |
| C              | -1.237074 | -3.660315 | 0.266633  |
| C              | -1.958366 | 3.252819  | -2.158389 |
| C              | -0.758299 | 3.944715  | -0.073836 |
| C              | -1.635793 | -0.067880 | 2.039276  |
| C              | 0.833908  | 1.286749  | 2.316862  |
| C              | 3.622076  | 0.341092  | -2.475657 |
| C              | 3.840133  | -1.484725 | -0.777413 |
| C              | -1.715559 | -3.343922 | -2.182465 |
| C              | -3.236489 | -2.367291 | -0.441392 |
| H              | 4.938807  | -1.429463 | -0.842233 |
| H              | -0.404911 | 3.667052  | 0.930803  |
| H              | -3.779976 | -3.315813 | -0.304660 |
| H              | 3.679964  | 0.610255  | 1.004315  |
| H              | 3.157236  | -0.328822 | -3.217058 |
| H              | 3.620477  | 1.930940  | -0.188710 |
| H              | 3.287207  | 1.368499  | -2.690563 |
| H              | 4.714965  | 0.302360  | -2.617666 |
| H              | 5.018437  | 0.837168  | -0.153760 |
| H              | 3.581043  | -1.862547 | 0.223977  |

|   |           |           |           |
|---|-----------|-----------|-----------|
| H | 3.502464  | -2.225227 | -1.518302 |
| H | -3.447595 | 3.591524  | 0.090253  |
| H | -2.490572 | 4.218192  | -2.141162 |
| H | -3.535836 | 1.861038  | -0.268240 |
| H | -2.627741 | 2.528345  | -2.654872 |
| H | -2.634350 | 2.419207  | 1.158441  |
| H | -1.061089 | 3.369901  | -2.787087 |
| H | -1.392408 | 4.840117  | 0.026794  |
| H | 0.118023  | 4.224980  | -0.676960 |
| H | -0.690467 | -3.656021 | -2.437814 |
| H | -0.186974 | -3.939703 | 0.095182  |
| H | -1.313479 | -3.235726 | 1.278446  |
| H | -2.067710 | -2.664763 | -2.977802 |
| H | -1.835782 | -4.584790 | 0.233287  |
| H | -2.359695 | -4.238831 | -2.204131 |
| H | -3.327209 | -1.791760 | 0.492050  |
| H | -3.761367 | -1.821013 | -1.241863 |
| H | -2.925177 | 0.162501  | -1.333434 |
| H | -1.542332 | 0.100908  | -3.024819 |

## VII

E=-2022.4156728

|    |           |           |           |
|----|-----------|-----------|-----------|
| Mo | 0.009344  | -0.164413 | 1.022705  |
| P  | -1.509051 | 0.876635  | -1.323815 |
| P  | 1.439648  | 1.045590  | -1.293374 |
| P  | 0.102798  | -1.785539 | -0.909160 |
| O  | 0.215256  | -2.655751 | 2.923719  |
| O  | -2.409843 | 0.724257  | 2.842754  |
| O  | 2.248414  | 1.166100  | 2.805917  |
| C  | -1.418401 | -0.823889 | -0.862715 |
| C  | 0.135879  | -1.744317 | 2.203518  |
| C  | -2.738972 | -1.667630 | -0.941089 |
| C  | -3.971746 | -0.843329 | -0.511614 |
| C  | -0.083746 | 1.712899  | -0.658669 |
| C  | 1.511197  | -0.664281 | -0.864858 |
| C  | 2.913831  | -1.366046 | -0.940582 |
| C  | 2.967232  | -2.592337 | -0.004851 |
| C  | -2.662908 | -2.892118 | -0.004115 |
| C  | -2.953761 | -2.156759 | -2.392701 |
| C  | -0.208102 | 3.271318  | -0.471046 |
| C  | 1.138208  | 3.894882  | -0.048097 |
| C  | -1.216278 | 3.583310  | 0.654948  |
| C  | -0.667679 | 3.960288  | -1.776784 |
| C  | -1.501518 | 0.413139  | 2.183935  |
| C  | 1.408183  | 0.672540  | 2.168062  |
| C  | 4.054596  | -0.419091 | -0.508376 |
| C  | 3.180449  | -1.826574 | -2.392706 |
| H  | -4.855156 | -1.500130 | -0.469306 |
| H  | 2.832354  | -2.294178 | 1.045086  |

|   |           |           |           |
|---|-----------|-----------|-----------|
| H | 0.980791  | 4.953995  | 0.210016  |
| H | -2.562638 | -2.580263 | 1.045848  |
| H | -3.001541 | -1.314519 | -3.103826 |
| H | -1.814872 | -3.550278 | -0.244370 |
| H | -2.133458 | -2.818818 | -2.712018 |
| H | -3.898809 | -2.718691 | -2.480498 |
| H | -3.584031 | -3.488931 | -0.104398 |
| H | -3.837023 | -0.397302 | 0.485959  |
| H | -4.215890 | -0.040359 | -1.227744 |
| H | 5.001461  | -0.980677 | -0.467441 |
| H | 4.175351  | -2.295113 | -2.478384 |
| H | 4.214753  | 0.407491  | -1.221384 |
| H | 3.150138  | -0.979672 | -3.099146 |
| H | 3.873689  | 0.006473  | 0.491043  |
| H | 2.428371  | -2.562561 | -2.718204 |
| H | 3.947490  | -3.086317 | -0.103720 |
| H | 2.196195  | -3.338704 | -0.246233 |
| H | -1.681180 | 3.645970  | -2.079247 |
| H | -2.217515 | 3.168815  | 0.463499  |
| H | -0.866134 | 3.176334  | 1.613760  |
| H | 0.015451  | 3.741705  | -2.614491 |
| H | -1.333143 | 4.674410  | 0.758800  |
| H | -0.698300 | 5.054926  | -1.649009 |
| H | 1.560782  | 3.394852  | 0.836580  |
| H | 1.886475  | 3.876294  | -0.857630 |
| H | 2.475236  | 1.726392  | -0.623327 |
| H | 1.780449  | 1.390951  | -2.665526 |
| H | -1.839699 | 1.148597  | -2.712081 |
| H | -2.622377 | 1.485474  | -0.703662 |

## VIII

E=-2023.5662246

|    |           |           |           |
|----|-----------|-----------|-----------|
| Mo | -0.008055 | 0.002127  | 1.086846  |
| P  | -0.413619 | -1.668609 | -1.302747 |
| P  | 1.674830  | 0.471373  | -1.267610 |
| P  | -1.227867 | 1.199200  | -1.303798 |
| O  | 2.459184  | 0.742506  | 2.871130  |
| O  | -0.611766 | -2.483070 | 2.899690  |
| O  | -1.889946 | 1.748480  | 2.885192  |
| C  | 1.208612  | -1.171394 | -0.769277 |
| C  | 2.335181  | -2.269691 | -0.749730 |
| C  | 1.859706  | -3.512827 | 0.032151  |
| C  | -1.608831 | -0.458630 | -0.778739 |
| C  | -3.122350 | -0.890564 | -0.768462 |
| C  | -3.983648 | 0.190925  | -0.080942 |
| C  | 1.523640  | 0.458644  | 2.223453  |
| C  | 0.415658  | 1.627668  | -0.777898 |
| C  | 0.794844  | 3.154196  | -0.757496 |
| C  | 2.179487  | 3.356139  | -0.104792 |

|   |           |           |           |
|---|-----------|-----------|-----------|
| C | -0.386512 | -1.546324 | 2.232472  |
| C | -1.175221 | 1.093486  | 2.226056  |
| C | 3.590809  | -1.737017 | -0.026759 |
| C | 2.729600  | -2.699857 | -2.181464 |
| C | -0.224352 | 3.944276  | 0.090417  |
| C | 0.828579  | 3.747160  | -2.184696 |
| C | -3.301967 | -2.190453 | 0.044506  |
| C | -3.657123 | -1.117120 | -2.200819 |
| H | 2.696513  | -4.222069 | 0.133645  |
| H | 2.242364  | 2.861149  | 0.875792  |
| H | -5.013080 | -0.182556 | 0.037329  |
| H | 3.346374  | -1.342951 | 0.970601  |
| H | 1.874247  | -3.126171 | -2.732103 |
| H | 4.105165  | -0.948301 | -0.599625 |
| H | 3.118235  | -1.852963 | -2.771410 |
| H | 3.517471  | -3.470903 | -2.153667 |
| H | 4.317603  | -2.555703 | 0.094421  |
| H | 1.506853  | -3.244031 | 1.037817  |
| H | 1.053245  | -4.057309 | -0.484747 |
| H | 0.107604  | 4.990670  | 0.181699  |
| H | 1.114387  | 4.811824  | -2.157815 |
| H | -1.225646 | 3.974294  | -0.368128 |
| H | -0.156140 | 3.686796  | -2.678202 |
| H | -0.321366 | 3.517161  | 1.098274  |
| H | 1.557458  | 3.225148  | -2.827000 |
| H | 2.360196  | 4.432754  | 0.041273  |
| H | 3.002027  | 2.986844  | -0.739341 |
| H | -3.110565 | -1.921734 | -2.720823 |
| H | -2.823882 | -3.060849 | -0.432935 |
| H | -2.895508 | -2.087185 | 1.060510  |
| H | -3.576646 | -0.206000 | -2.816961 |
| H | -4.374676 | -2.428996 | 0.121135  |
| H | -4.721004 | -1.406516 | -2.178179 |
| H | -3.593343 | 0.445532  | 0.915254  |
| H | -4.056253 | 1.115844  | -0.676211 |
| H | -2.111268 | 2.067226  | -0.635246 |
| H | -1.573927 | 1.528146  | -2.681102 |
| H | -0.523220 | -2.127463 | -2.681691 |
| H | -0.723156 | -2.870909 | -0.639270 |
| H | 2.842566  | 0.802243  | -0.555642 |
| H | 2.179068  | 0.613185  | -2.628827 |

$\text{Mo}(\text{CO})_3(\text{C}_6\text{H}_6) (C_{3v})$

E=-640.3855864

|    |           |           |           |
|----|-----------|-----------|-----------|
| Mo | -0.118444 | -0.000051 | 0.000126  |
| O  | -1.966277 | -1.723437 | -1.879040 |
| O  | -1.969898 | -0.764694 | 2.430039  |
| O  | -1.964567 | 2.490298  | -0.553974 |
| C  | 1.801836  | -0.362193 | -1.371433 |

|   |           |           |           |
|---|-----------|-----------|-----------|
| C | 1.805184  | -1.374927 | -0.360006 |
| C | 1.800750  | -1.008228 | 1.000239  |
| C | 1.805273  | 0.374132  | 1.371151  |
| C | 1.801810  | 1.368907  | 0.373507  |
| C | 1.805839  | 0.999306  | -1.009158 |
| C | -1.307468 | -1.078935 | -1.175475 |
| C | -1.309692 | -0.478052 | 1.520959  |
| C | -1.306917 | 1.557984  | -0.347409 |
| H | 1.803133  | 1.770527  | -1.779478 |
| H | 1.798899  | -0.646464 | -2.424021 |
| H | 1.802946  | -2.427453 | -0.643692 |
| H | 1.795559  | -1.777445 | 1.772815  |
| H | 1.803509  | 0.655235  | 2.424367  |
| H | 1.796858  | 2.422411  | 0.654252  |

Mo(CO)<sub>3</sub>(C<sub>6</sub>H<sub>6</sub>) TS (C<sub>3v</sub>, NImag=1)

E= -640.3853113

|    |           |           |           |
|----|-----------|-----------|-----------|
| Mo | 0.000000  | 0.000000  | 0.118565  |
| O  | 0.000000  | 2.549971  | 1.965165  |
| O  | -2.208340 | -1.274986 | 1.965165  |
| O  | 2.208340  | -1.274986 | 1.965165  |
| C  | 0.000000  | 1.594699  | 1.308162  |
| C  | -1.381050 | -0.797350 | 1.308162  |
| C  | 1.381050  | -0.797350 | 1.308162  |
| C  | 1.223721  | -0.706516 | -1.787596 |
| C  | 0.000000  | 1.413031  | -1.787596 |
| C  | -1.223721 | -0.706516 | -1.787596 |
| C  | 0.000000  | -1.426085 | -1.817839 |
| C  | 1.235026  | 0.713043  | -1.817839 |
| C  | -1.235026 | 0.713043  | -1.817839 |
| H  | 0.000000  | -2.515443 | -1.823590 |
| H  | 2.178438  | 1.257722  | -1.823590 |
| H  | -2.178438 | 1.257722  | -1.823590 |
| H  | -2.168447 | -1.251954 | -1.773998 |
| H  | 2.168447  | -1.251954 | -1.773998 |
| H  | 0.000000  | 2.503907  | -1.773998 |
